# Supplementary material for: Contact engineering for 2D Janus MoSSe/metal junctions
Source: Royal Society of Chemistry journal article supplement (doi:10.1039/d3nh00450c), 2023-11-16
Supplement: d3nh00450c1.pdf [file d3nh00450c1.pdf]

## Supplementary Information

### **Contact engineering for 2D Janus MoSSe/metal junctions**

Yu Shu<sup>1</sup>, Ting Li<sup>1</sup>, Naihua Miao<sup>2</sup>, Jian Gou<sup>3</sup>, Xiaochun Huang<sup>4,\*</sup>, Zhou Cui<sup>1</sup>, Rui Xiong<sup>1</sup>,

Cuilian Wen<sup>1</sup>, Jian Zhou<sup>2</sup>, Baisheng Sa<sup>1,\*</sup>, Zhimei Sun<sup>2,\*</sup>

<sup>1</sup> *Multiscale Computational Materials Facility, College of Materials Science and Engineering,*

*Fuzhou University, Fuzhou 350108, P. R. China*

<sup>2</sup> *School of Materials Science and Engineering, Beihang University, Beijing 100191, P. R*

*China*

<sup>3</sup> *School of Physics, Zhejiang University, Hangzhou 310058, P. R China*

<sup>4</sup> *Department of Physics, University of Hamburg, D-20355 Hamburg, Germany*

**Corresponding authors:** [huangxiaochun0321@gmail.com](mailto:huangxiaochun0321@gmail.com); [bssa@fzu.edu.cn](mailto:bssa@fzu.edu.cn) (B. Sa)

[zmsun@buaa.edu.cn](mailto:zmsun@buaa.edu.cn) (Z. Sun)

**Table S1** The calculated relative total energies  $\Delta E_{\text{tot}}$  ( $10^{-3}$  eV) of the six possible configurations for Nb<sub>2</sub>CT<sub>2</sub>-MoSSe contacts. (Total energy of the most stable configuration is set as the reference of zero energy for each configuration)

| System                                    | Configuration | $\Delta E_{\text{tot}}$ | System                                    | Configuration | $\Delta E_{\text{tot}}$ |
|-------------------------------------------|---------------|-------------------------|-------------------------------------------|---------------|-------------------------|
| Nb <sub>2</sub> C/SeMoS                   | I             | 203.39                  | Nb <sub>2</sub> C/SMoSe                   | I             | 373.96                  |
|                                           | II            | 255.53                  |                                           | II            | 59.64                   |
|                                           | III           | 10.10                   |                                           | III           | 196.26                  |
|                                           | IV            | 0.00                    |                                           | IV            | 159.48                  |
|                                           | V             | 274.83                  |                                           | V             | 0.00                    |
|                                           | VI            | 166.30                  |                                           | VI            | 376.29                  |
| Nb <sub>2</sub> CF <sub>2</sub> /SeMoS    | I             | 68.229                  | Nb <sub>2</sub> CF <sub>2</sub> /SMoSe    | I             | 74.82                   |
|                                           | II            | 6.59                    |                                           | II            | 1.21                    |
|                                           | III           | 7.20                    |                                           | III           | 6.37                    |
|                                           | IV            | 0.00                    |                                           | IV            | 0.00                    |
|                                           | V             | 68.99                   |                                           | V             | 13.01                   |
|                                           | VI            | 5.64                    |                                           | VI            | 75.28                   |
| Nb <sub>2</sub> CO <sub>2</sub> /SeMoS    | I             | 111.65                  | Nb <sub>2</sub> CO <sub>2</sub> /SMoSe    | I             | 127.48                  |
|                                           | II            | 4.57                    |                                           | II            | 16.20                   |
|                                           | III           | 6.11                    |                                           | III           | 0.00                    |
|                                           | IV            | 6.80                    |                                           | IV            | 13.96                   |
|                                           | V             | 70.45                   |                                           | V             | 85.44                   |
|                                           | VI            | 0.00                    |                                           | VI            | 19.42                   |
| Nb <sub>2</sub> C(OH) <sub>2</sub> /SeMoS | I             | 19.12                   | Nb <sub>2</sub> C(OH) <sub>2</sub> /SMoSe | I             | 0.00                    |
|                                           | II            | 11.64                   |                                           | II            | 77.859                  |
|                                           | III           | 0.00                    |                                           | III           | 66.985                  |
|                                           | IV            | 3.60                    |                                           | IV            | 67.971                  |
|                                           | V             | 61.03                   |                                           | V             | 43.825                  |
|                                           | VI            | 21.25                   |                                           | VI            | 73.215                  |

**Table S2** The calculated relative total energies  $\Delta E_{\text{tot}}$  ( $10^{-3}$  eV) of the six possible configurations for  $\text{Nb}_3\text{C}_2\text{T}_2$ -MoSSe contacts. (Total energy of the most stable configuration is set as the reference of zero energy for each configuration)

| System                                            | Configuration | $\Delta E_{\text{tot}}$ | System                                            | Configuration | $\Delta E_{\text{tot}}$ |
|---------------------------------------------------|---------------|-------------------------|---------------------------------------------------|---------------|-------------------------|
| $\text{Nb}_3\text{C}_2/\text{SeMoS}$              | I             | 491.68                  | $\text{Nb}_3\text{C}_2/\text{SMoSe}$              | I             | 160.33                  |
|                                                   | II            | 279.30                  |                                                   | II            | 508.80                  |
|                                                   | III           | 401.64                  |                                                   | III           | 0.00                    |
|                                                   | IV            | 358.71                  |                                                   | IV            | 443.32                  |
|                                                   | V             | 0.00                    |                                                   | V             | 122.76                  |
|                                                   | VI            | 419.92                  |                                                   | VI            | 125.61                  |
| $\text{Nb}_3\text{C}_2\text{F}_2/\text{SeMoS}$    | I             | 16.67                   | $\text{Nb}_3\text{C}_2\text{F}_2/\text{SMoSe}$    | I             | 21.41                   |
|                                                   | II            | 59.86                   |                                                   | II            | 65.53                   |
|                                                   | III           | 6.85                    |                                                   | III           | 7.98                    |
|                                                   | IV            | 3.97                    |                                                   | IV            | 10.20                   |
|                                                   | V             | 0.00                    |                                                   | V             | 0.00                    |
|                                                   | VI            | 60.77                   |                                                   | VI            | 66.18                   |
| $\text{Nb}_3\text{C}_2\text{O}_2/\text{SeMoS}$    | I             | 33.57                   | $\text{Nb}_3\text{C}_2\text{O}_2/\text{SMoSe}$    | I             | 39.51                   |
|                                                   | II            | 70.33                   |                                                   | II            | 0.00                    |
|                                                   | III           | 5.46                    |                                                   | III           | 74.74                   |
|                                                   | IV            | 0.00                    |                                                   | IV            | 2.96                    |
|                                                   | V             | 6.12                    |                                                   | V             | 74.97                   |
|                                                   | VI            | 71.37                   |                                                   | VI            | 4.46                    |
| $\text{Nb}_3\text{C}_2(\text{OH})_2/\text{SeMoS}$ | I             | 64.56                   | $\text{Nb}_3\text{C}_2(\text{OH})_2/\text{SMoSe}$ | I             | 70.58                   |
|                                                   | II            | 22.27                   |                                                   | II            | 0.00                    |
|                                                   | III           | 17.45                   |                                                   | III           | 39.32                   |
|                                                   | IV            | 28.56                   |                                                   | IV            | 37.41                   |
|                                                   | V             | 0.00                    |                                                   | V             | 24.22                   |
|                                                   | VI            | 27.40                   |                                                   | VI            | 5.97                    |

**Table S3** The calculated relative total energies  $\Delta E_{\text{tot}}$  ( $10^{-3}$  eV) of the six possible configurations for  $\text{MX}_2\text{-MoSSe}$  contacts. (Total energy of the most stable configuration is set as the reference of zero energy for each configuration)

| System                      | Configuration | $\Delta E_{\text{tot}}$ | System                      | Configuration | $\Delta E_{\text{tot}}$ |
|-----------------------------|---------------|-------------------------|-----------------------------|---------------|-------------------------|
| $\text{VS}_2/\text{SeMoS}$  | I             | 67.03                   | $\text{VS}_2/\text{SMoSe}$  | I             | 71.95                   |
|                             | II            | 0.28                    |                             | II            | 0.00                    |
|                             | III           | 1.54                    |                             | III           | 2.71                    |
|                             | IV            | 4.28                    |                             | IV            | 3.92                    |
|                             | V             | 0.00                    |                             | V             | 7.71                    |
|                             | VI            | 59.47                   |                             | VI            | 68.72                   |
| $\text{NbS}_2/\text{SeMoS}$ | I             | 91.57                   | $\text{NbS}_2/\text{SMoSe}$ | I             | 80.30                   |
|                             | II            | 0.00                    |                             | II            | 0.34                    |
|                             | III           | 14.02                   |                             | III           | 0.00                    |
|                             | IV            | 9.65                    |                             | IV            | 13.306                  |
|                             | V             | 14.05                   |                             | V             | 1.53                    |
|                             | VI            | 1.05                    |                             | VI            | 76.586                  |
| $\text{TaS}_2/\text{SeMoS}$ | I             | 83.47                   | $\text{TaS}_2/\text{SMoSe}$ | I             | 75.06                   |
|                             | II            | 0.00                    |                             | II            | 0.00                    |
|                             | III           | 8.96                    |                             | III           | 3.97                    |
|                             | IV            | 13.95                   |                             | IV            | 1.66                    |
|                             | V             | 7.39                    |                             | V             | 10.04                   |
|                             | VI            | 79.75                   |                             | VI            | 71.82                   |
| $\text{VSe}_2/\text{SeMoS}$ | I             | 82.07                   | $\text{VSe}_2/\text{SMoSe}$ | I             | 82.01                   |
|                             | II            | 0.00                    |                             | II            | 2.78                    |
|                             | III           | 5.61                    |                             | III           | 0.00                    |
|                             | IV            | 16.33                   |                             | IV            | 7.46                    |
|                             | V             | 2.79                    |                             | V             | 8.21                    |
|                             | VI            | 78.10                   |                             | VI            | 78.09                   |

**Table S4** Tunneling barrier height  $\Phi_{\text{TB}}$ , width  $w_{\text{TB}}$  and comprehensive factor  $C$  of 2D metal-MoSSe contacts

| 2D metal                                         | $\Phi_{\text{TB}}$ (eV) |      | $w_{\text{TB}}$ (Å) |      | $C$ (eV·Å <sup>2</sup> ) |       |
|--------------------------------------------------|-------------------------|------|---------------------|------|--------------------------|-------|
|                                                  | Se                      | S    | Se                  | S    | Se                       | S     |
| Nb <sub>2</sub> C                                | 1.46                    | 0    | 0.67                | 0    | 0.66                     | 0     |
| Nb <sub>2</sub> CF <sub>2</sub>                  | 3.58                    | 3.57 | 1.42                | 1.34 | 7.17                     | 6.45  |
| Nb <sub>2</sub> CO <sub>2</sub>                  | 4.60                    | 4.86 | 1.55                | 1.57 | 11.01                    | 11.92 |
| Nb <sub>2</sub> COH <sub>2</sub>                 | 1.20                    | 1.88 | 0.87                | 1.08 | 0.78                     | 2.18  |
| Nb <sub>3</sub> C <sub>2</sub>                   | 1.42                    | 0    | 0.64                | 0    | 0.58                     | 0     |
| Nb <sub>3</sub> C <sub>2</sub> F <sub>2</sub>    | 4.02                    | 4.08 | 1.49                | 1.48 | 8.93                     | 8.94  |
| Nb <sub>3</sub> C <sub>2</sub> O <sub>2</sub>    | 4.50                    | 4.63 | 1.53                | 1.52 | 10.52                    | 10.76 |
| Nb <sub>3</sub> C <sub>2</sub> (OH) <sub>2</sub> | 1.10                    | 1.81 | 0.82                | 1.10 | 0.74                     | 2.19  |
| VS <sub>2</sub>                                  | 4.80                    | 4.82 | 1.60                | 1.50 | 12.32                    | 10.91 |
| NbS <sub>2</sub>                                 | 4.50                    | 4.73 | 1.37                | 1.49 | 8.41                     | 10.48 |
| TaS <sub>2</sub>                                 | 4.53                    | 4.84 | 1.52                | 1.58 | 10.44                    | 12.03 |
| VSe <sub>2</sub>                                 | 4.15                    | 4.32 | 1.50                | 1.50 | 9.38                     | 9.71  |

**Table S5** Electronic SBH  $\Phi_n$  (eV), hole SBH  $\Phi_p$  (eV), interface dipole  $D_{\text{int}}$  (Debye), tot dipole  $D_{\text{tot}}$  (Debye), potential step  $\Delta V$  (eV), the difference between the metal and MSJs work functions  $\Delta W$  (eV), metal work functions  $W_M$  (eV) of 2D metal-SeMoS contacts (ML, BL, and TL represent monolayer, bilayer, and trilayer, respectively)

|                                                  | Metal                                            | $\Phi_n$ | $\Phi_p$ | $D_{\text{int}}$ | $D_{\text{tot}}$ | $\Delta V$ | $\Delta W$ | $W_M$ |
|--------------------------------------------------|--------------------------------------------------|----------|----------|------------------|------------------|------------|------------|-------|
| ML-MoSSe                                         | Nb <sub>2</sub> CF <sub>2</sub>                  | 0.77     | 0.86     | -0.25            | -0.48            | -0.70      | 0.69       | 4.37  |
|                                                  | Nb <sub>2</sub> CO <sub>2</sub>                  | 1.57     | 0.03     | -0.08            | -0.31            | -0.22      | 0.11       | 5.81  |
|                                                  | Nb <sub>2</sub> COH <sub>2</sub>                 | -0.10    | 1.52     | -1.13            | -1.37            | -2.41      | 2.33       | 2.22  |
|                                                  | Nb <sub>3</sub> C <sub>2</sub> F <sub>2</sub>    | 1.03     | 0.50     | -0.28            | -0.51            | -0.76      | 0.62       | 4.89  |
|                                                  | Nb <sub>3</sub> C <sub>2</sub> O <sub>2</sub>    | 1.59     | 0.05     | -0.21            | -0.44            | -0.51      | 0.44       | 5.48  |
|                                                  | Nb <sub>3</sub> C <sub>2</sub> (OH) <sub>2</sub> | -0.33    | 1.49     | -1.20            | -1.43            | -2.42      | 2.45       | 2.10  |
|                                                  | VS <sub>2</sub>                                  | 1.48     | 0.06     | 0.05             | -0.18            | 0.12       | 0.09       | 6.02  |
|                                                  | NbS <sub>2</sub>                                 | 1.25     | 0.08     | 0.08             | -0.15            | 0.18       | -0.01      | 6.08  |
|                                                  | TaS <sub>2</sub>                                 | 1.21     | 0.11     | 0.02             | -0.21            | 0.04       | 0.01       | 5.92  |
|                                                  | VSe <sub>2</sub>                                 | 0.92     | 0.50     | -0.15            | -0.38            | -0.25      | 0.26       | 5.46  |
|                                                  | Nb <sub>2</sub> CF <sub>2</sub>                  | 0.63     | 0.27     | -0.57            | -1.04            | -1.47      | 1.44       | 4.37  |
|                                                  | Nb <sub>2</sub> CO <sub>2</sub>                  | 1.38     | 0.04     | -0.15            | -0.61            | -0.30      | 0.13       | 5.81  |
| Nb <sub>2</sub> COH <sub>2</sub>                 | -0.09                                            | 0.78     | -1.62    | -2.08            | -3.62            | 3.64       | 2.22       |       |
| Nb <sub>3</sub> C <sub>2</sub> F <sub>2</sub>    | 0.72                                             | 0.26     | -0.58    | -1.04            | -1.28            | 0.98       | 4.89       |       |
| Nb <sub>3</sub> C <sub>2</sub> O <sub>2</sub>    | 1.12                                             | 0.02     | -0.29    | -0.75            | -0.59            | 0.37       | 5.48       |       |
| Nb <sub>3</sub> C <sub>2</sub> (OH) <sub>2</sub> | -0.23                                            | 0.83     | -1.70    | -2.16            | -2.02            | 3.11       | 2.10       |       |
| VS <sub>2</sub>                                  | 1.28                                             | 0.02     | 0.08     | -0.38            | 0.22             | 0.09       | 6.02       |       |
| NbS <sub>2</sub>                                 | 0.78                                             | 0.00     | 0.10     | -0.36            | 0.25             | -0.03      | 6.08       |       |
| TaS <sub>2</sub>                                 | 0.77                                             | 0.01     | 0.13     | -0.34            | 0.17             | -0.01      | 5.92       |       |
| VSe <sub>2</sub>                                 | 0.71                                             | 0.03     | -0.14    | -0.60            | -0.29            | 0.28       | 5.46       |       |
| Nb <sub>2</sub> CF <sub>2</sub>                  | 0.51                                             | 0.25     | -0.77    | -1.24            | -2.06            | 1.07       | 4.37       |       |
| Nb <sub>2</sub> CO <sub>2</sub>                  | 1.17                                             | 0.02     | -0.14    | -0.60            | -0.27            | 0.08       | 5.81       |       |
| Nb <sub>2</sub> COH <sub>2</sub>                 | -0.08                                            | 0.06     | -2.31    | -2.77            | -3.60            | 3.47       | 2.22       |       |
| Nb <sub>3</sub> C <sub>2</sub> F <sub>2</sub>    | 0.51                                             | 0.04     | -0.73    | -1.20            | -1.28            | 0.91       | 4.89       |       |
| Nb <sub>3</sub> C <sub>2</sub> O <sub>2</sub>    | 0.95                                             | 0.03     | -0.33    | -0.79            | -0.55            | 0.32       | 5.48       |       |
| Nb <sub>3</sub> C <sub>2</sub> (OH) <sub>2</sub> | -0.14                                            | 0.20     | -2.46    | -2.93            | -3.83            | 3.74       | 2.10       |       |
| VS <sub>2</sub>                                  | 1.19                                             | 0.02     | 0.19     | -0.27            | 0.23             | 0.11       | 6.02       |       |
| NbS <sub>2</sub>                                 | 0.85                                             | 0.00     | 0.15     | -0.31            | 0.27             | -0.04      | 6.08       |       |
| TaS <sub>2</sub>                                 | 0.78                                             | 0.01     | 0.05     | -0.41            | 0.15             | -0.01      | 5.92       |       |
| VSe <sub>2</sub>                                 | 0.65                                             | 0.02     | -0.17    | -0.64            | -0.33            | 0.30       | 5.46       |       |

**Table S6** Electronic SBH  $\Phi_n$  (eV), hole SBH  $\Phi_p$  (eV), interface dipole  $D_{\text{int}}$  (Debye), tot dipole  $D_{\text{tot}}$  (Debye), potential step  $\Delta V$  (eV), the difference between the metal and MSJs work functions  $\Delta W$  (eV), metal work functions  $W_M$  (eV) of 2D metal-SMoSe contacts (ML, BL, and TL represent monolayer, bilayer, and trilayer, respectively)

|                                                  | Metal                                            | $\Phi_n$ | $\Phi_p$ | $D_{\text{int}}$ | $D_{\text{tot}}$ | $\Delta V$ | $\Delta W$ | $w_m$ |
|--------------------------------------------------|--------------------------------------------------|----------|----------|------------------|------------------|------------|------------|-------|
| ML-MoSSe                                         | Nb <sub>2</sub> CF <sub>2</sub>                  | 0.18     | 1.55     | 0.30             | 0.53             | 0.78       | 0.01       | 4.37  |
|                                                  | Nb <sub>2</sub> CO <sub>2</sub>                  | 1.17     | 0.41     | 0.32             | 0.56             | 0.92       | -0.10      | 5.81  |
|                                                  | Nb <sub>2</sub> COH <sub>2</sub>                 | -0.17    | 1.66     | -0.80            | -0.57            | -1.68      | 1.58       | 2.22  |
|                                                  | Nb <sub>3</sub> C <sub>2</sub> F <sub>2</sub>    | 0.33     | 1.21     | 0.31             | 0.54             | 0.67       | -0.11      | 4.89  |
|                                                  | Nb <sub>3</sub> C <sub>2</sub> O <sub>2</sub>    | 1.00     | 0.58     | 0.34             | 0.57             | 0.81       | -0.07      | 5.48  |
|                                                  | Nb <sub>3</sub> C <sub>2</sub> (OH) <sub>2</sub> | -0.28    | 1.58     | -0.86            | -0.63            | -1.72      | 1.70       | 2.10  |
|                                                  | VS <sub>2</sub>                                  | 1.12     | 0.47     | 0.47             | 0.70             | 1.22       | 0.12       | 6.02  |
|                                                  | NbS <sub>2</sub>                                 | 0.66     | 0.46     | 0.49             | 0.72             | 1.20       | 0.03       | 6.08  |
|                                                  | TaS <sub>2</sub>                                 | 0.59     | 0.57     | 0.42             | 0.65             | 1.03       | 0.02       | 5.92  |
|                                                  | VSe <sub>2</sub>                                 | 0.43     | 0.63     | 0.33             | 0.57             | 0.84       | -0.01      | 5.46  |
|                                                  | Nb <sub>2</sub> CF <sub>2</sub>                  | 0.02     | 1.05     | 0.34             | 0.81             | 0.74       | 0.02       | 4.37  |
|                                                  | Nb <sub>2</sub> CO <sub>2</sub>                  | 0.67     | 0.19     | 0.53             | 0.99             | 1.36       | -0.51      | 5.81  |
| Nb <sub>2</sub> COH <sub>2</sub>                 | -0.11                                            | 1.24     | -0.97    | -0.50            | -1.74            | 1.61       | 2.22       |       |
| Nb <sub>3</sub> C <sub>2</sub> F <sub>2</sub>    | 0.05                                             | 1.02     | 0.38     | 0.85             | 0.13             | -0.25      | 4.89       |       |
| Nb <sub>3</sub> C <sub>2</sub> O <sub>2</sub>    | 0.67                                             | 0.29     | 0.68     | 1.15             | 1.52             | -0.19      | 5.48       |       |
| Nb <sub>3</sub> C <sub>2</sub> (OH) <sub>2</sub> | -0.20                                            | 1.45     | -1.02    | -0.55            | -1.71            | 1.70       | 2.10       |       |
| VS <sub>2</sub>                                  | 0.42                                             | 0.32     | 0.76     | 1.22             | 2.07             | 0.14       | 6.02       |       |
| NbS <sub>2</sub>                                 | 0.13                                             | 0.37     | 0.77     | 1.23             | 1.74             | 0.03       | 6.08       |       |
| TaS <sub>2</sub>                                 | 0.04                                             | 0.49     | 0.80     | 1.26             | 1.67             | 0.02       | 5.92       |       |
| VSe <sub>2</sub>                                 | 0.04                                             | 0.61     | 0.60     | 1.06             | 1.53             | 0.01       | 5.46       |       |
| Nb <sub>2</sub> CF <sub>2</sub>                  | -0.01                                            | 0.35     | 0.38     | 0.84             | 0.72             | 0.02       | 4.37       |       |
| Nb <sub>2</sub> CO <sub>2</sub>                  | 0.13                                             | 0.47     | 0.94     | 1.41             | 1.98             | 0.08       | 5.81       |       |
| Nb <sub>2</sub> COH <sub>2</sub>                 | -0.04                                            | 0.21     | -1.87    | -1.41            | -1.62            | 3.47       | 2.22       |       |
| Nb <sub>3</sub> C <sub>2</sub> F <sub>2</sub>    | 0.01                                             | 0.84     | 0.54     | 1.00             | 3.51             | -0.32      | 4.89       |       |
| Nb <sub>3</sub> C <sub>2</sub> O <sub>2</sub>    | 0.24                                             | 0.39     | 0.63     | 1.09             | 1.65             | -0.18      | 5.48       |       |
| Nb <sub>3</sub> C <sub>2</sub> (OH) <sub>2</sub> | -0.04                                            | 1.10     | -1.08    | -0.61            | -1.63            | 1.66       | 2.10       |       |
| VS <sub>2</sub>                                  | 0.54                                             | 0.23     | 0.54     | 1.01             | 1.21             | 0.13       | 6.02       |       |
| NbS <sub>2</sub>                                 | 0.36                                             | 0.38     | 0.35     | 0.81             | 0.93             | 0.01       | 6.08       |       |
| TaS <sub>2</sub>                                 | 0.06                                             | 0.51     | 0.45     | 0.91             | 0.98             | 0.01       | 5.92       |       |
| VSe <sub>2</sub>                                 | 0.03                                             | 0.66     | 0.39     | 0.86             | 0.78             | 0.00       | 5.46       |       |

**Table S7** Electronic SBH  $\Phi_n$  (eV), hole SBH  $\Phi_p$  (eV), interface dipole  $D_{\text{int}}$  (Debye), tot dipole  $D_{\text{tot}}$  (Debye), potential step  $\Delta V$  (eV), the difference between the metal and MSJs work functions  $\Delta W$  (eV), metal work functions  $W_M$  (eV) of 2D metal-SeMoS contacts under different strains

|     | Metal                                            | $\Phi_n$ | $\Phi_p$ | $D_{\text{int}}$ | $D_{\text{tot}}$ | $\Delta V$ | $\Delta W$ | $W_M$ |
|-----|--------------------------------------------------|----------|----------|------------------|------------------|------------|------------|-------|
| -6% | Nb <sub>2</sub> CF <sub>2</sub>                  | 0.58     | 1.00     | -0.27            | -0.49            | -0.85      | 0.43       | 4.37  |
|     | Nb <sub>2</sub> CO <sub>2</sub>                  | 1.46     | 0.04     | -0.11            | -0.32            | -0.37      | 0.39       | 5.81  |
|     | Nb <sub>2</sub> COH <sub>2</sub>                 | -0.20    | 1.52     | -0.48            | -0.69            | -2.09      | 2.32       | 2.22  |
|     | Nb <sub>3</sub> C <sub>2</sub> F <sub>2</sub>    | 1.11     | 0.33     | -0.27            | -0.49            | -0.87      | 0.66       | 4.89  |
|     | Nb <sub>3</sub> C <sub>2</sub> O <sub>2</sub>    | 1.38     | 0.04     | -0.18            | -0.39            | -0.48      | 0.32       | 5.48  |
|     | Nb <sub>3</sub> C <sub>2</sub> (OH) <sub>2</sub> | -0.22    | 1.51     | -0.93            | -1.15            | -2.16      | 2.46       | 2.10  |
|     | VS <sub>2</sub>                                  | 1.40     | 0.13     | 0.01             | -0.20            | 0.04       | -0.09      | 6.02  |
|     | NbS <sub>2</sub>                                 | 1.36     | 0.37     | 0.02             | -0.19            | 0.02       | -0.12      | 6.08  |
|     | TaS <sub>2</sub>                                 | 1.34     | 0.40     | -0.04            | -0.25            | -0.09      | 0.01       | 5.92  |
|     | VSe <sub>2</sub>                                 | 1.03     | 0.63     | -0.12            | -0.33            | -0.41      | 0.18       | 5.46  |
| -4% | Nb <sub>2</sub> CF <sub>2</sub>                  | 0.67     | 0.94     | -0.27            | -0.49            | -0.80      | 0.52       | 4.37  |
|     | Nb <sub>2</sub> CO <sub>2</sub>                  | 1.51     | 0.04     | -0.11            | -0.33            | -0.32      | 0.47       | 5.81  |
|     | Nb <sub>2</sub> COH <sub>2</sub>                 | -0.15    | 1.52     | -0.95            | -1.16            | -2.19      | 2.30       | 2.22  |
|     | Nb <sub>3</sub> C <sub>2</sub> F <sub>2</sub>    | 1.08     | 0.40     | -0.28            | -0.50            | -0.81      | 0.62       | 4.89  |
|     | Nb <sub>3</sub> C <sub>2</sub> O <sub>2</sub>    | 1.45     | 0.04     | -0.18            | -0.40            | -0.49      | 0.37       | 5.48  |
|     | Nb <sub>3</sub> C <sub>2</sub> (OH) <sub>2</sub> | -0.17    | 1.50     | -1.01            | -1.23            | -2.20      | 3.79       | 2.10  |
|     | VS <sub>2</sub>                                  | 1.44     | 0.10     | 0.03             | -0.19            | 0.07       | -0.02      | 6.02  |
|     | NbS <sub>2</sub>                                 | 1.43     | 0.32     | 0.01             | -0.21            | 0.01       | -0.08      | 6.08  |
|     | TaS <sub>2</sub>                                 | 1.40     | 0.36     | -0.04            | -0.26            | -0.12      | 0.06       | 5.92  |
|     | VSe <sub>2</sub>                                 | 1.03     | 0.65     | -0.12            | -0.33            | -0.34      | 0.20       | 5.46  |
| -2% | Nb <sub>2</sub> CF <sub>2</sub>                  | 0.73     | 0.89     | -0.26            | -0.49            | -0.75      | 0.60       | 4.37  |
|     | Nb <sub>2</sub> CO <sub>2</sub>                  | 1.55     | 0.03     | -0.09            | -0.32            | -0.28      | 0.54       | 5.81  |
|     | Nb <sub>2</sub> COH <sub>2</sub>                 | -0.12    | 1.52     | -1.03            | -1.26            | -2.29      | 2.30       | 2.22  |
|     | Nb <sub>3</sub> C <sub>2</sub> F <sub>2</sub>    | 1.07     | 0.44     | -0.28            | -0.51            | -0.76      | 0.59       | 4.89  |
|     | Nb <sub>3</sub> C <sub>2</sub> O <sub>2</sub>    | 1.58     | 0.05     | -0.20            | -0.42            | -0.50      | 0.40       | 5.48  |
|     | Nb <sub>3</sub> C <sub>2</sub> (OH) <sub>2</sub> | -0.12    | 1.49     | -1.10            | -1.33            | -2.29      | 2.44       | 2.10  |
|     | VS <sub>2</sub>                                  | 1.47     | 0.07     | 0.04             | -0.19            | 0.09       | 0.04       | 6.02  |
|     | NbS <sub>2</sub>                                 | 1.35     | 0.25     | 0.03             | -0.20            | 0.07       | -0.04      | 6.08  |
|     | TaS <sub>2</sub>                                 | 1.46     | 0.30     | -0.02            | -0.25            | -0.06      | 0.04       | 5.92  |



|                                                  |                                                  |                                 |       |       |       |       |       |      |
|--------------------------------------------------|--------------------------------------------------|---------------------------------|-------|-------|-------|-------|-------|------|
| 2%                                               | VSe <sub>2</sub>                                 | 1.06                            | 0.63  | -0.12 | -0.35 | -0.27 | 0.21  | 5.46 |
|                                                  | Nb <sub>2</sub> CF <sub>2</sub>                  | 0.70                            | 0.84  | -0.24 | -0.48 | -0.64 | 0.78  | 4.37 |
|                                                  | Nb <sub>2</sub> CO <sub>2</sub>                  | 1.58                            | 0.04  | -0.07 | -0.31 | -0.18 | 0.16  | 5.81 |
|                                                  | Nb <sub>2</sub> COH <sub>2</sub>                 | -0.07                           | 1.52  | -1.25 | -1.49 | -2.53 | -2.22 | 2.22 |
|                                                  | Nb <sub>3</sub> C <sub>2</sub> F <sub>2</sub>    | 0.97                            | 0.56  | -0.30 | -0.54 | -0.69 | 0.62  | 4.89 |
|                                                  | Nb <sub>3</sub> C <sub>2</sub> O <sub>2</sub>    | 1.58                            | 0.07  | -0.22 | -0.45 | -0.51 | 0.47  | 5.48 |
|                                                  | Nb <sub>3</sub> C <sub>2</sub> (OH) <sub>2</sub> | -0.28                           | 1.49  | -1.30 | -1.54 | -2.53 | 2.45  | 2.10 |
|                                                  | VS <sub>2</sub>                                  | 1.01                            | 0.04  | 0.09  | -0.15 | 0.21  | 0.13  | 6.02 |
|                                                  | NbS <sub>2</sub>                                 | 1.00                            | 0.04  | 0.12  | -0.12 | 0.27  | 0.03  | 6.08 |
|                                                  | TaS <sub>2</sub>                                 | 0.99                            | 0.05  | 0.05  | -0.19 | 0.12  | 0.03  | 5.92 |
|                                                  | VSe <sub>2</sub>                                 | 0.81                            | 0.32  | -0.13 | -0.37 | -0.28 | 0.34  | 5.46 |
|                                                  | 4%                                               | Nb <sub>2</sub> CF <sub>2</sub> | 0.53  | 0.74  | -0.23 | -0.48 | -0.65 | 0.93 |
| Nb <sub>2</sub> CO <sub>2</sub>                  |                                                  | 1.53                            | 0.04  | -0.05 | -0.30 | -0.13 | 0.19  | 5.81 |
| Nb <sub>2</sub> COH <sub>2</sub>                 |                                                  | -0.01                           | 1.39  | -1.39 | -1.64 | -2.71 | -2.22 | 2.22 |
| Nb <sub>3</sub> C <sub>2</sub> F <sub>2</sub>    |                                                  | 0.93                            | 0.60  | -0.27 | -0.51 | -0.65 | 0.63  | 4.89 |
| Nb <sub>3</sub> C <sub>2</sub> O <sub>2</sub>    |                                                  | 1.43                            | 0.07  | -0.20 | -0.44 | -0.45 | 0.47  | 5.48 |
| Nb <sub>3</sub> C <sub>2</sub> (OH) <sub>2</sub> |                                                  | -0.21                           | 1.49  | -1.40 | -1.64 | -2.64 | 2.48  | 2.10 |
| VS <sub>2</sub>                                  |                                                  | 1.17                            | 0.02  | 0.12  | -0.12 | 0.29  | 0.16  | 6.02 |
| NbS <sub>2</sub>                                 |                                                  | 0.77                            | -0.02 | 0.14  | -0.10 | 0.32  | 0.06  | 6.08 |
| TaS <sub>2</sub>                                 |                                                  | 0.76                            | 0.03  | 0.08  | -0.17 | 0.17  | 0.05  | 5.92 |
| VSe <sub>2</sub>                                 |                                                  | 0.68                            | 0.21  | -0.11 | -0.35 | -0.24 | 0.34  | 5.46 |
| Nb <sub>2</sub> CF <sub>2</sub>                  |                                                  | 0.32                            | 0.70  | -0.22 | -0.47 | -0.54 | 0.92  | 4.37 |
| Nb <sub>2</sub> CO <sub>2</sub>                  |                                                  | 1.30                            | 0.03  | -0.01 | -0.26 | -0.02 | 0.15  | 5.81 |
| 6%                                               | Nb <sub>2</sub> COH <sub>2</sub>                 | -0.05                           | 1.18  | -1.56 | -1.81 | -2.94 | -2.22 | 2.22 |
|                                                  | Nb <sub>3</sub> C <sub>2</sub> F <sub>2</sub>    | 0.79                            | 0.65  | -0.29 | -0.54 | -0.59 | 0.62  | 4.89 |
|                                                  | Nb <sub>3</sub> C <sub>2</sub> O <sub>2</sub>    | 1.19                            | 0.04  | -0.14 | -0.39 | -0.31 | 0.44  | 5.48 |
|                                                  | Nb <sub>3</sub> C <sub>2</sub> (OH) <sub>2</sub> | -0.14                           | 1.45  | -1.50 | -1.75 | -2.78 | 2.53  | 2.10 |
|                                                  | VS <sub>2</sub>                                  | 0.93                            | -0.01 | 0.14  | -0.11 | 0.34  | 0.19  | 6.02 |
|                                                  | NbS <sub>2</sub>                                 | 0.57                            | -0.01 | 0.16  | -0.09 | 0.35  | 0.09  | 6.08 |
|                                                  | TaS <sub>2</sub>                                 | 0.56                            | 0.02  | 0.09  | -0.15 | 0.20  | 0.07  | 5.92 |
|                                                  | VSe <sub>2</sub>                                 | 0.58                            | -0.09 | -0.08 | -0.33 | -0.17 | 0.32  | 5.46 |

**Table S8** Electronic SBH  $\Phi_n$  (eV), hole SBH  $\Phi_p$  (eV), interface dipole  $D_{\text{int}}$  (Debye), tot dipole  $D_{\text{tot}}$  (Debye), potential step  $\Delta V$  (eV), the difference between the metal and MSJs work functions  $\Delta W$  (eV), metal work functions  $W_M$  (eV) of 2D metal-SMoSe contacts under different strains

|     | Metal                                            | $\Phi_n$ | $\Phi_p$ | $D_{\text{int}}$ | $D_{\text{tot}}$ | $\Delta V$ | $\Delta W$ | $w_m$ |
|-----|--------------------------------------------------|----------|----------|------------------|------------------|------------|------------|-------|
| -6% | Nb <sub>2</sub> CF <sub>2</sub>                  | 0.04     | 1.54     | 0.17             | 0.38             | 0.47       | 0.06       | 4.37  |
|     | Nb <sub>2</sub> CO <sub>2</sub>                  | 1.00     | 0.50     | 0.27             | 0.48             | 0.83       | -1.35      | 5.81  |
|     | Nb <sub>2</sub> COH <sub>2</sub>                 | -0.31    | 1.65     | -0.56            | -0.35            | -1.33      | 1.54       | 2.22  |
|     | Nb <sub>3</sub> C <sub>2</sub> F <sub>2</sub>    | 0.42     | 1.01     | 0.15             | 0.36             | 0.72       | 0.25       | 4.89  |
|     | Nb <sub>3</sub> C <sub>2</sub> O <sub>2</sub>    | 0.85     | 0.62     | 0.28             | 0.49             | 0.74       | -0.15      | 5.48  |
|     | Nb <sub>3</sub> C <sub>2</sub> (OH) <sub>2</sub> | -0.30    | 1.54     | -0.92            | -0.71            | -2.11      | 2.40       | 2.10  |
|     | VS <sub>2</sub>                                  | 0.70     | 0.87     | 0.46             | 0.68             | 1.35       | -0.08      | 6.02  |
|     | NbS <sub>2</sub>                                 | 0.71     | 1.03     | 0.52             | 0.73             | 0.56       | -0.50      | 6.08  |
|     | TaS <sub>2</sub>                                 | 0.67     | 1.06     | 0.45             | 0.66             | 1.25       | -0.09      | 5.92  |
|     | VSe <sub>2</sub>                                 | 0.55     | 1.15     | 0.32             | 0.53             | 0.91       | -0.22      | 5.46  |
| -4% | Nb <sub>2</sub> CF <sub>2</sub>                  | 0.05     | 1.56     | 0.19             | 0.41             | 0.59       | 0.16       | 4.37  |
|     | Nb <sub>2</sub> CO <sub>2</sub>                  | 1.07     | 0.47     | 0.29             | 0.51             | 0.93       | -0.24      | 5.81  |
|     | Nb <sub>2</sub> COH <sub>2</sub>                 | -0.24    | 1.54     | -0.63            | -0.41            | -1.44      | 1.55       | 2.22  |
|     | Nb <sub>3</sub> C <sub>2</sub> F <sub>2</sub>    | 0.38     | 1.10     | 0.14             | 0.36             | 0.72       | 0.24       | 4.89  |
|     | Nb <sub>3</sub> C <sub>2</sub> O <sub>2</sub>    | 1.09     | 0.46     | 0.33             | 0.55             | 0.80       | -0.11      | 5.48  |
|     | Nb <sub>3</sub> C <sub>2</sub> (OH) <sub>2</sub> | -0.16    | 1.50     | -1.01            | -0.79            | -2.21      | 2.43       | 2.10  |
|     | VS <sub>2</sub>                                  | 0.80     | 0.74     | 0.47             | 0.69             | 1.30       | 0.00       | 6.02  |
|     | NbS <sub>2</sub>                                 | 0.79     | 0.82     | 0.51             | 0.73             | 0.46       | -0.47      | 6.08  |
|     | TaS <sub>2</sub>                                 | 0.75     | 0.88     | 0.44             | 0.66             | 1.17       | -0.07      | 5.92  |
|     | VSe <sub>2</sub>                                 | 0.57     | 1.04     | 0.33             | 0.55             | 0.90       | -0.14      | 5.46  |
| -2% | Nb <sub>2</sub> CF <sub>2</sub>                  | 0.07     | 1.57     | 0.26             | 0.49             | 0.69       | 0.24       | 4.37  |
|     | Nb <sub>2</sub> CO <sub>2</sub>                  | 1.13     | 0.43     | 0.31             | 0.53             | 0.88       | -0.19      | 5.81  |
|     | Nb <sub>2</sub> COH <sub>2</sub>                 | -0.08    | 1.48     | -0.71            | -0.49            | -1.56      | 1.56       | 2.22  |
|     | Nb <sub>3</sub> C <sub>2</sub> F <sub>2</sub>    | 0.35     | 1.16     | 0.28             | 0.51             | 0.77       | 0.25       | 4.89  |
|     | Nb <sub>3</sub> C <sub>2</sub> O <sub>2</sub>    | 1.04     | 0.52     | 0.32             | 0.54             | 0.82       | -0.09      | 5.48  |
|     | Nb <sub>3</sub> C <sub>2</sub> (OH) <sub>2</sub> | -0.12    | 1.50     | -1.11            | -0.88            | -2.31      | 2.41       | 2.10  |
|     | VS <sub>2</sub>                                  | 0.89     | 0.63     | 0.47             | 0.69             | 1.25       | 0.06       | 6.02  |
|     | NbS <sub>2</sub>                                 | 0.77     | 0.63     | 0.50             | 0.73             | 0.36       | -0.45      | 6.08  |
|     | TaS <sub>2</sub>                                 | 0.73     | 0.73     | 0.43             | 0.66             | 1.09       | -0.02      | 5.92  |

|    |                                                  |       |      |       |       |       |       |      |
|----|--------------------------------------------------|-------|------|-------|-------|-------|-------|------|
| 2% | VSe <sub>2</sub>                                 | 0.59  | 0.87 | 0.34  | 0.56  | 0.88  | -0.07 | 5.46 |
|    | Nb <sub>2</sub> CF <sub>2</sub>                  | 0.07  | 1.43 | 0.31  | 0.55  | 0.75  | 0.43  | 4.37 |
|    | Nb <sub>2</sub> CO <sub>2</sub>                  | 1.22  | 0.38 | 0.34  | 0.58  | 0.89  | -0.02 | 5.81 |
|    | Nb <sub>2</sub> COH <sub>2</sub>                 | -0.09 | 1.60 | -0.90 | -0.67 | -1.79 | 1.60  | 2.22 |
|    | Nb <sub>3</sub> C <sub>2</sub> F <sub>2</sub>    | 0.30  | 1.26 | 0.33  | 0.57  | 0.82  | 0.29  | 4.89 |
|    | Nb <sub>3</sub> C <sub>2</sub> O <sub>2</sub>    | 0.96  | 0.64 | 0.36  | 0.60  | 0.88  | -0.03 | 5.48 |
|    | Nb <sub>3</sub> C <sub>2</sub> (OH) <sub>2</sub> | -0.22 | 1.54 | -1.32 | -1.08 | -2.55 | 2.46  | 2.10 |
|    | VS <sub>2</sub>                                  | 0.98  | 0.31 | 0.49  | 0.73  | 1.22  | 0.16  | 6.02 |
|    | NbS <sub>2</sub>                                 | 0.56  | 0.30 | 0.51  | 0.75  | 0.20  | -0.42 | 6.08 |
|    | TaS <sub>2</sub>                                 | 0.50  | 0.40 | 0.43  | 0.67  | 1.00  | 0.04  | 5.92 |
|    | VSe <sub>2</sub>                                 | 0.31  | 0.56 | 0.33  | 0.57  | 0.81  | 0.05  | 5.46 |
| 4% | Nb <sub>2</sub> CF <sub>2</sub>                  | 0.04  | 1.20 | 0.30  | 0.55  | 0.71  | 0.57  | 4.37 |
|    | Nb <sub>2</sub> CO <sub>2</sub>                  | 1.15  | 0.32 | 0.36  | 0.61  | 0.96  | 0.06  | 5.81 |
|    | Nb <sub>2</sub> COH <sub>2</sub>                 | -0.05 | 1.53 | -1.02 | -0.77 | -1.93 | 1.60  | 2.22 |
|    | Nb <sub>3</sub> C <sub>2</sub> F <sub>2</sub>    | 0.30  | 1.27 | 0.34  | 0.58  | 0.84  | 0.31  | 4.89 |
|    | Nb <sub>3</sub> C <sub>2</sub> O <sub>2</sub>    | 0.86  | 0.54 | 0.40  | 0.64  | 0.91  | 0.03  | 5.48 |
|    | Nb <sub>3</sub> C <sub>2</sub> (OH) <sub>2</sub> | -0.16 | 1.53 | -1.42 | -1.18 | -2.68 | 2.50  | 2.10 |
|    | VS <sub>2</sub>                                  | 0.87  | 0.17 | 0.54  | 0.78  | 1.22  | 0.18  | 6.02 |
|    | NbS <sub>2</sub>                                 | 0.48  | 0.16 | 0.54  | 0.79  | 0.19  | -0.43 | 6.08 |
|    | TaS <sub>2</sub>                                 | 0.41  | 0.27 | 0.46  | 0.70  | 1.02  | 0.06  | 5.92 |
|    | VSe <sub>2</sub>                                 | 0.22  | 0.42 | 0.32  | 0.57  | 0.77  | 0.11  | 5.46 |
|    | Nb <sub>2</sub> CF <sub>2</sub>                  | 0.03  | 0.98 | 0.27  | 0.52  | 0.61  | 0.60  | 4.37 |
| 6% | Nb <sub>2</sub> CO <sub>2</sub>                  | 1.02  | 0.18 | 0.39  | 0.64  | 1.15  | 0.12  | 5.81 |
|    | Nb <sub>2</sub> COH <sub>2</sub>                 | -0.08 | 1.42 | -1.15 | -0.90 | -2.12 | -2.22 | 2.22 |
|    | Nb <sub>3</sub> C <sub>2</sub> F <sub>2</sub>    | 0.12  | 1.29 | 0.34  | 0.59  | 0.84  | 0.33  | 4.89 |
|    | Nb <sub>3</sub> C <sub>2</sub> O <sub>2</sub>    | 0.73  | 0.44 | 0.43  | 0.67  | 0.95  | 0.14  | 5.48 |
|    | Nb <sub>3</sub> C <sub>2</sub> (OH) <sub>2</sub> | -0.08 | 1.48 | -1.52 | -1.27 | -2.80 | 2.54  | 2.10 |
|    | VS <sub>2</sub>                                  | 0.74  | 0.06 | 0.57  | 0.82  | 1.31  | 0.20  | 6.02 |
|    | NbS <sub>2</sub>                                 | 0.39  | 0.06 | 0.57  | 0.82  | 0.17  | -0.42 | 6.08 |
|    | TaS <sub>2</sub>                                 | 0.34  | 0.14 | 0.48  | 0.73  | 1.04  | 0.08  | 5.92 |
|    | VSe <sub>2</sub>                                 | 0.15  | 0.29 | 0.33  | 0.58  | 0.74  | 0.15  | 5.46 |

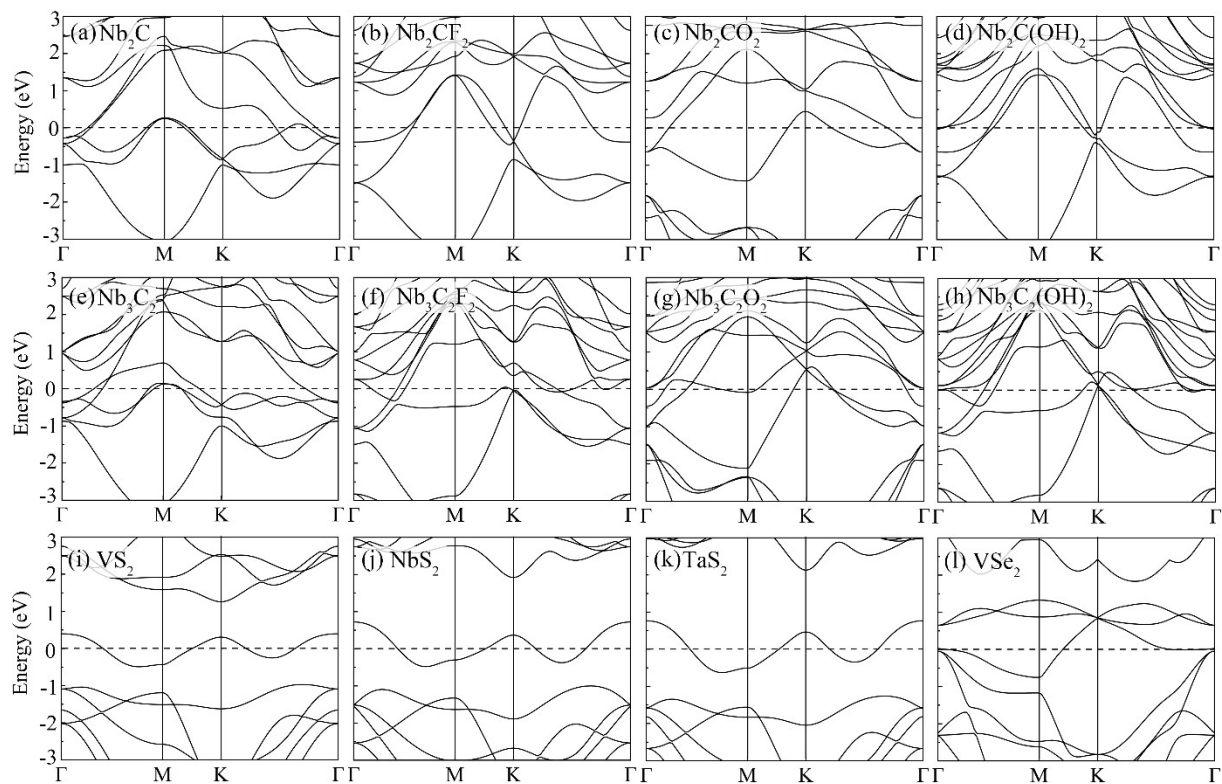

**Fig. S1** The band structures of (a)  $\text{Nb}_2\text{C}$ , (b)  $\text{Nb}_2\text{CF}_2$ , (c)  $\text{Nb}_2\text{CO}_2$ , (d)  $\text{Nb}_2\text{C}(\text{OH})_2$ , (e)  $\text{Nb}_3\text{C}_2$ , (f)  $\text{Nb}_3\text{C}_2\text{F}_2$ , (g)  $\text{Nb}_3\text{C}_2\text{O}_2$ , (h)  $\text{Nb}_3\text{C}_2(\text{OH})_2$ , (i)  $\text{VS}_2$ , (j)  $\text{NbS}_2$ , (k)  $\text{TaS}_2$ , and (l)  $\text{VSe}_2$  monolayers.

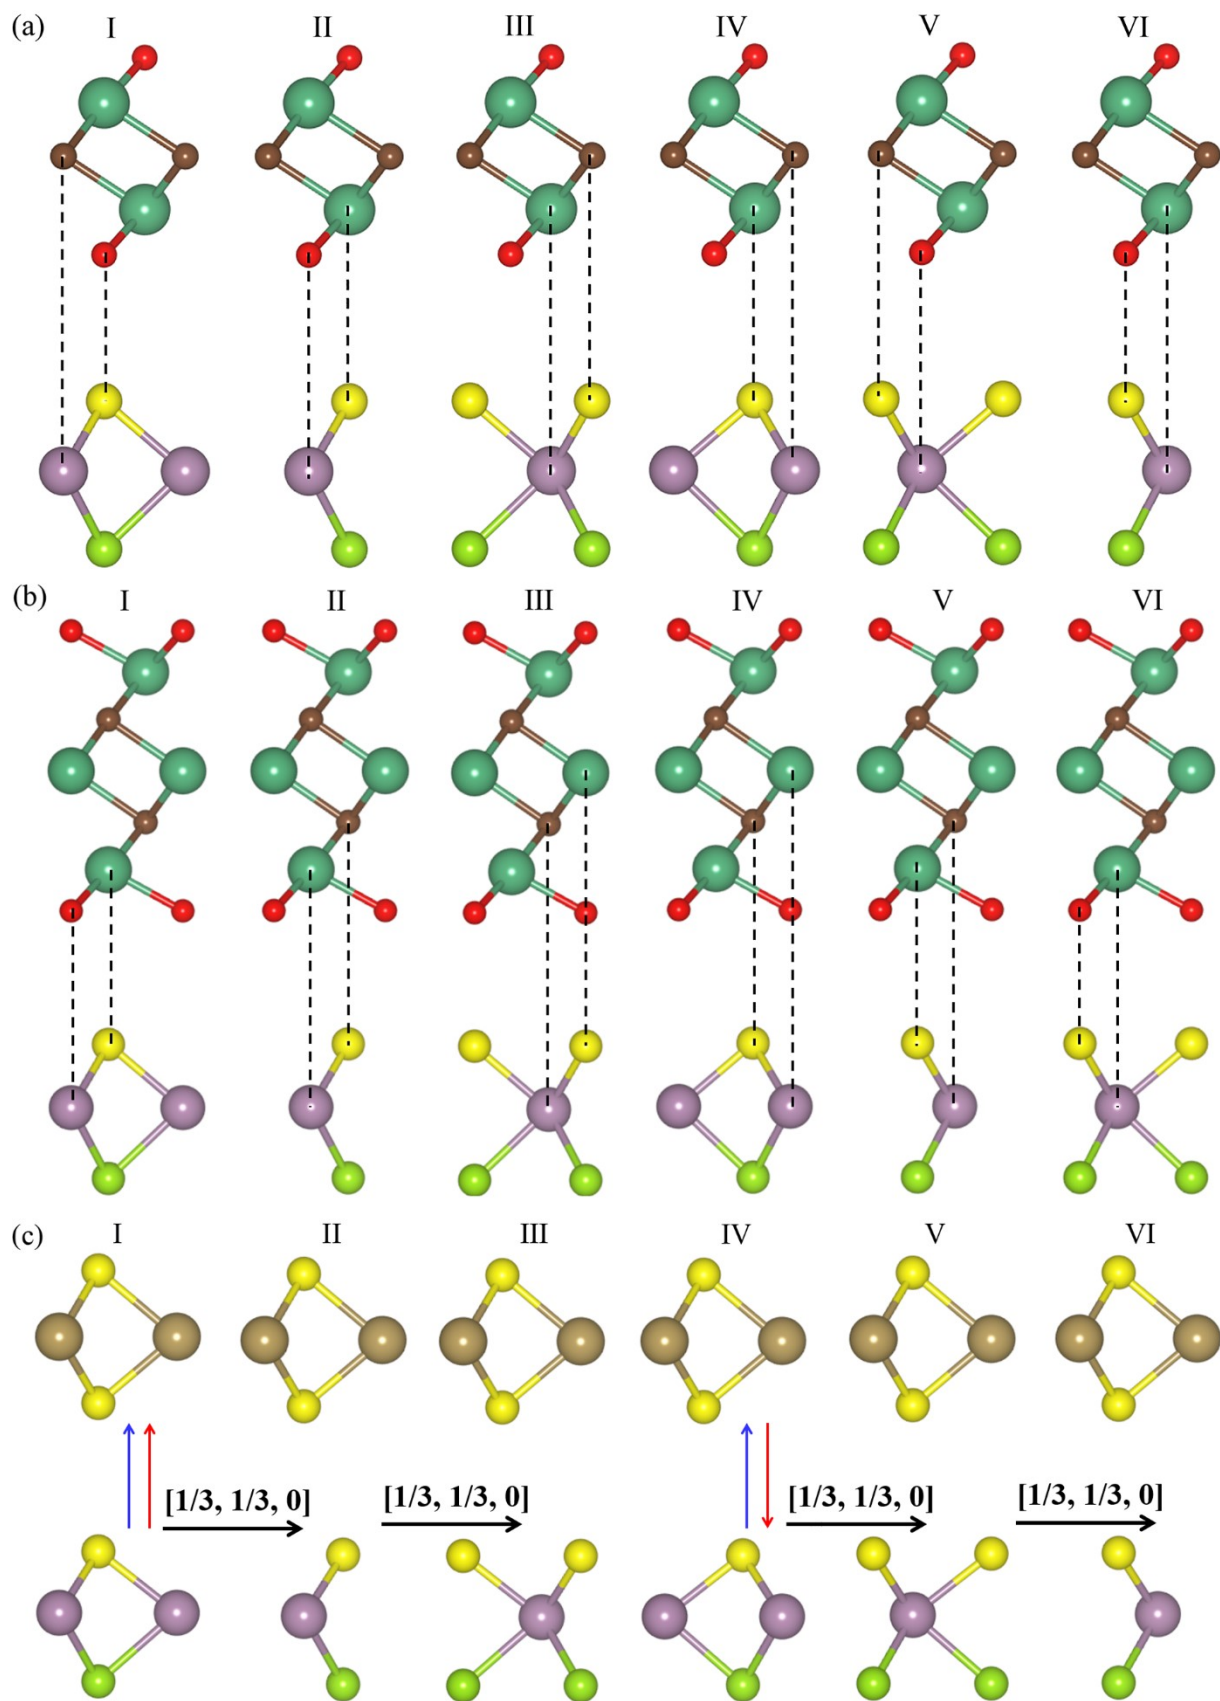

**Fig. S2** Side view of (a)  $\text{Nb}_2\text{CT}_2$ -MoSSe, (b)  $\text{Nb}_3\text{C}_2\text{T}_2$ -MoSSe (c)  $\text{MX}_2$ -MoSSe contacts with six possible stacking configurations.



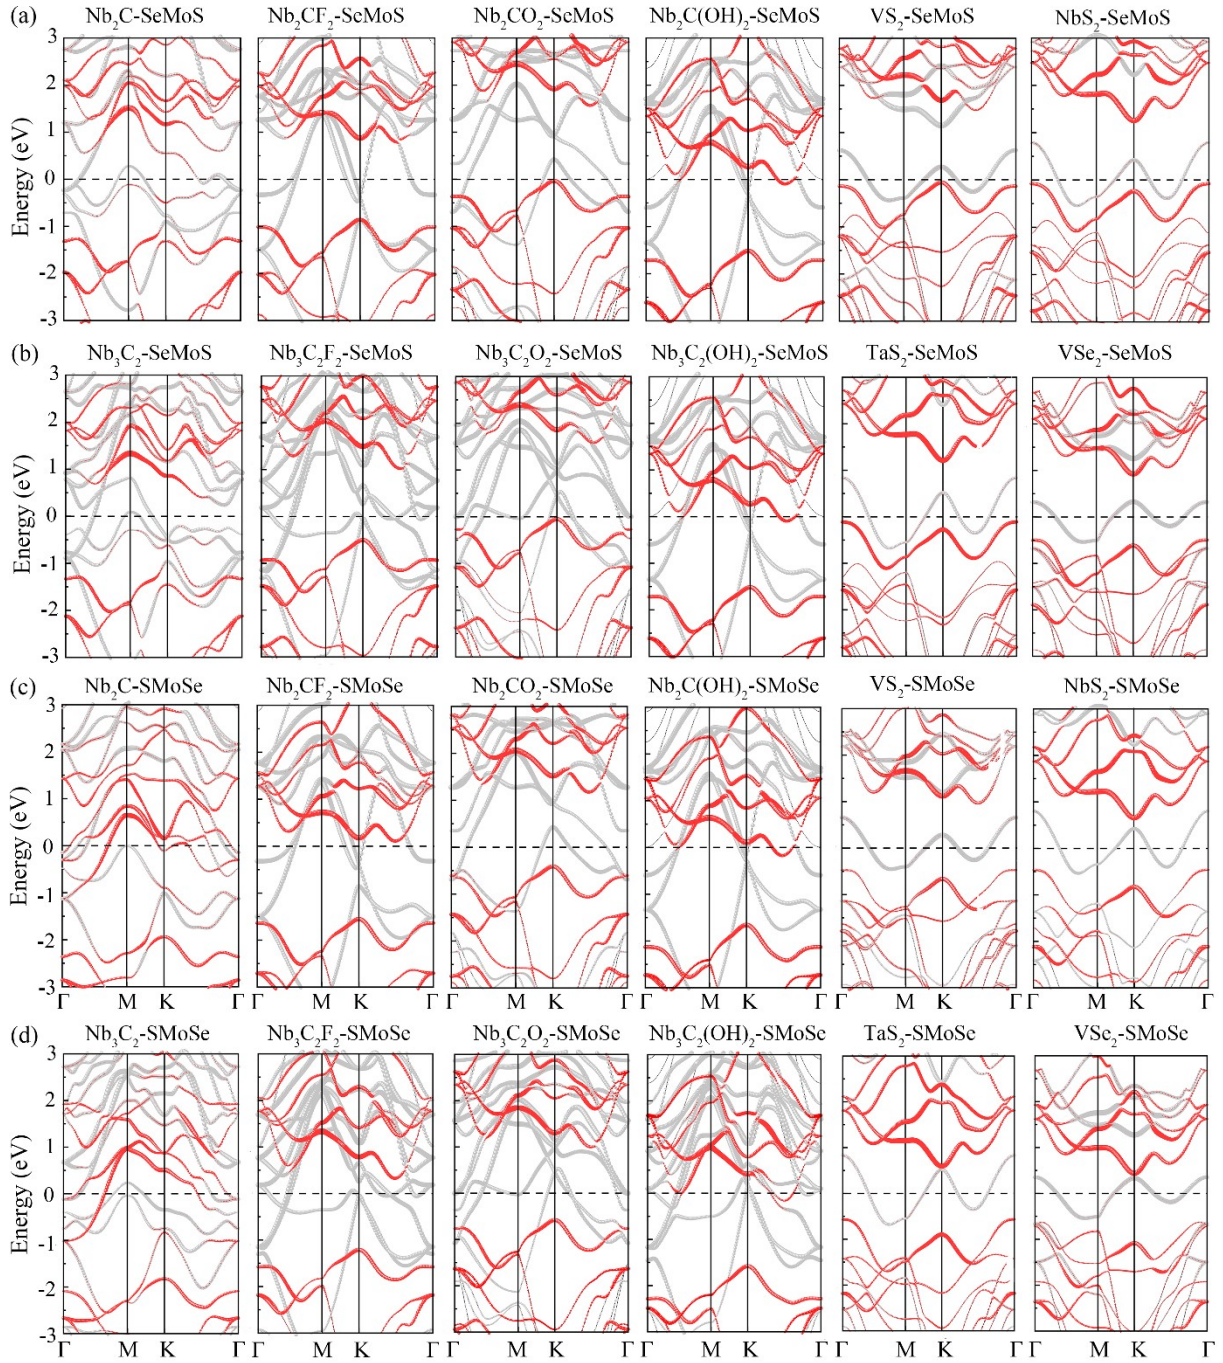

**Fig. S3** The projected band structures of (a, b) metal-SeMoS and (c, d) metal-SMoSe contacts. The red and gray spheres represent the contributions from MoS<sub>2</sub> and metal layers, respectively.

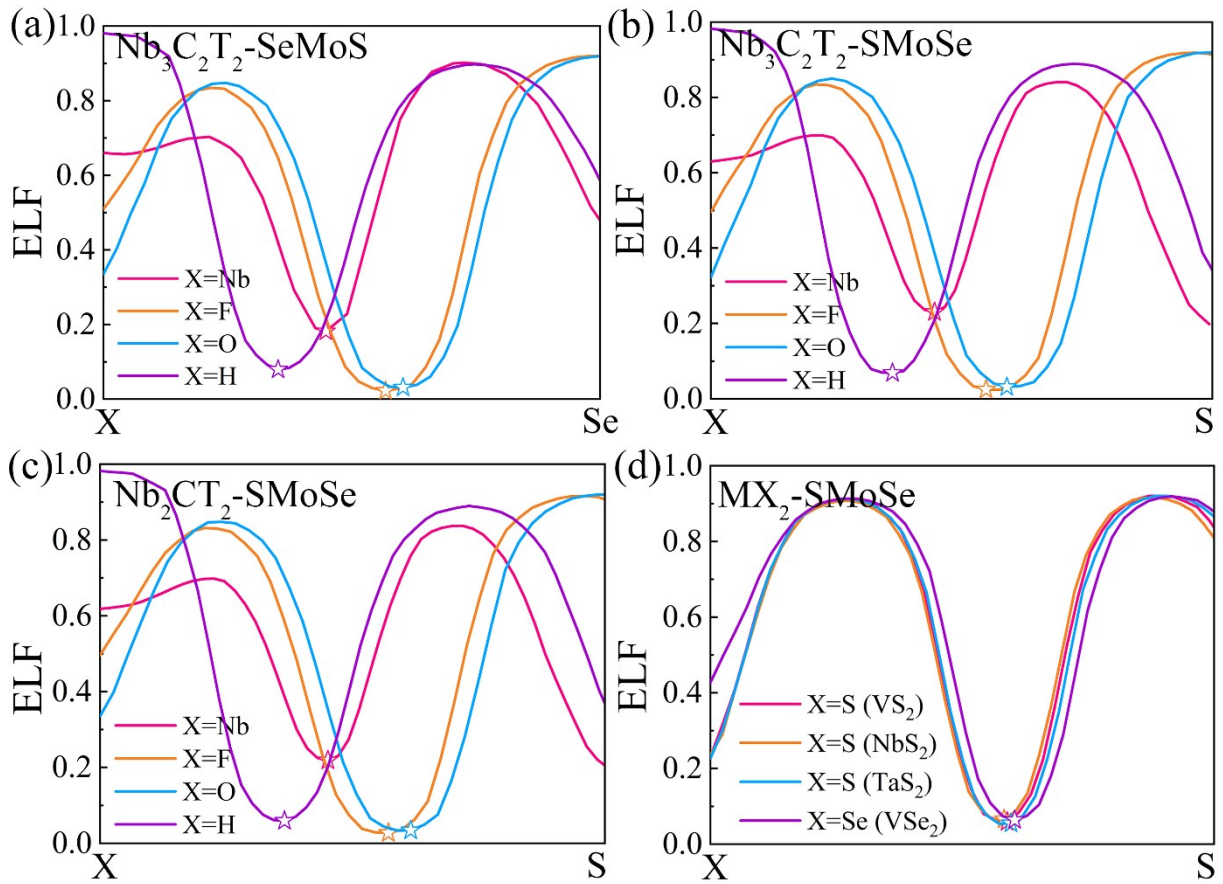

**Fig. S4** The ELF 2D line profiles and bond points of the (a) X–Se and (b-d) X–S bonds in 2D metal-MoSSe contacts. The pentagrams represent the bond points of the X–Se and X–S bonds in 2D metal-MoSSe contacts.

(a) metal-SeMoS

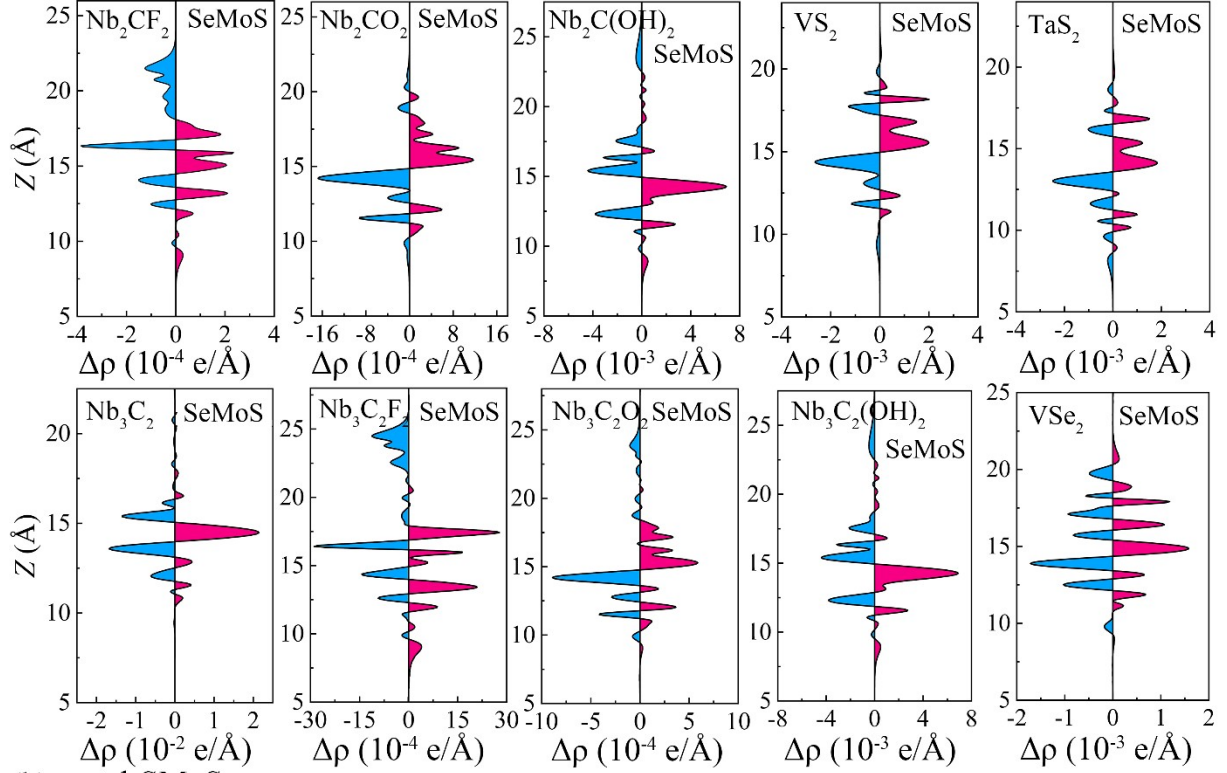

(b) metal-SMoSe

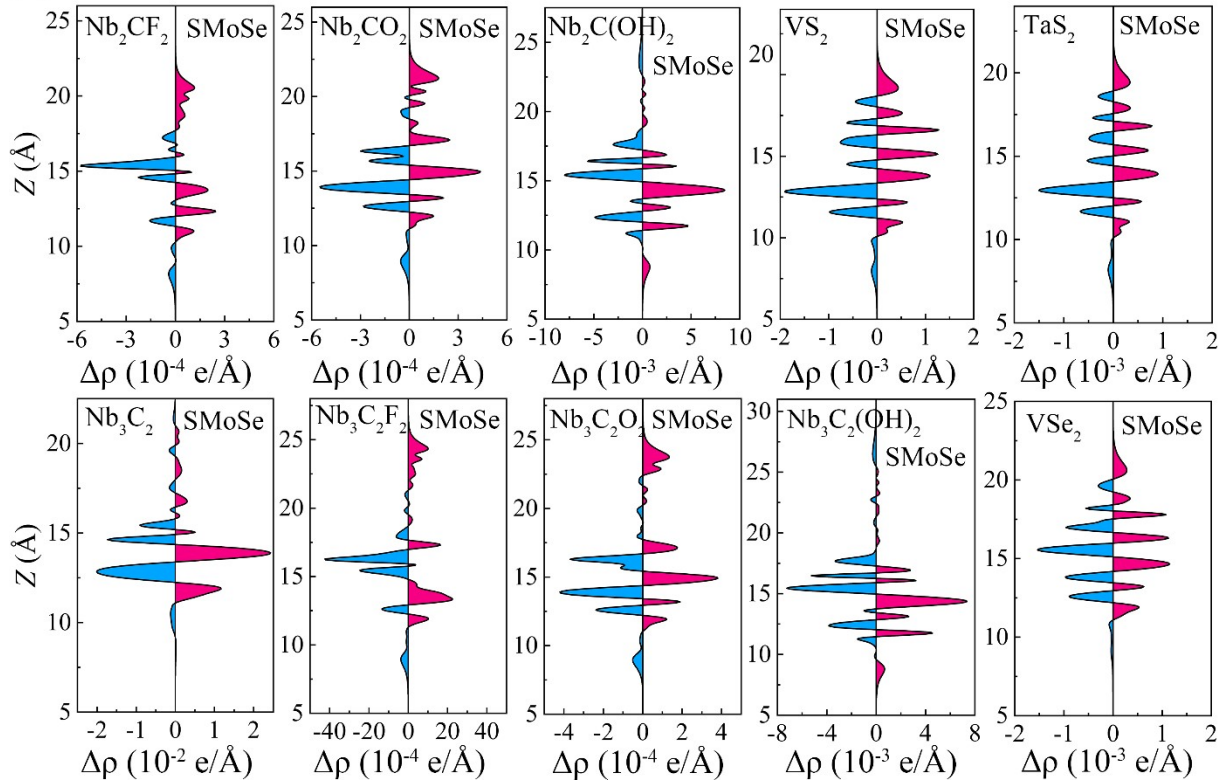

**Fig. S5** The plane averaged charge density difference for (a) metal-SeMoS and (b) metal-SMoSe contacts. Pink indicates charge accumulation, azure indicates charge depletion.



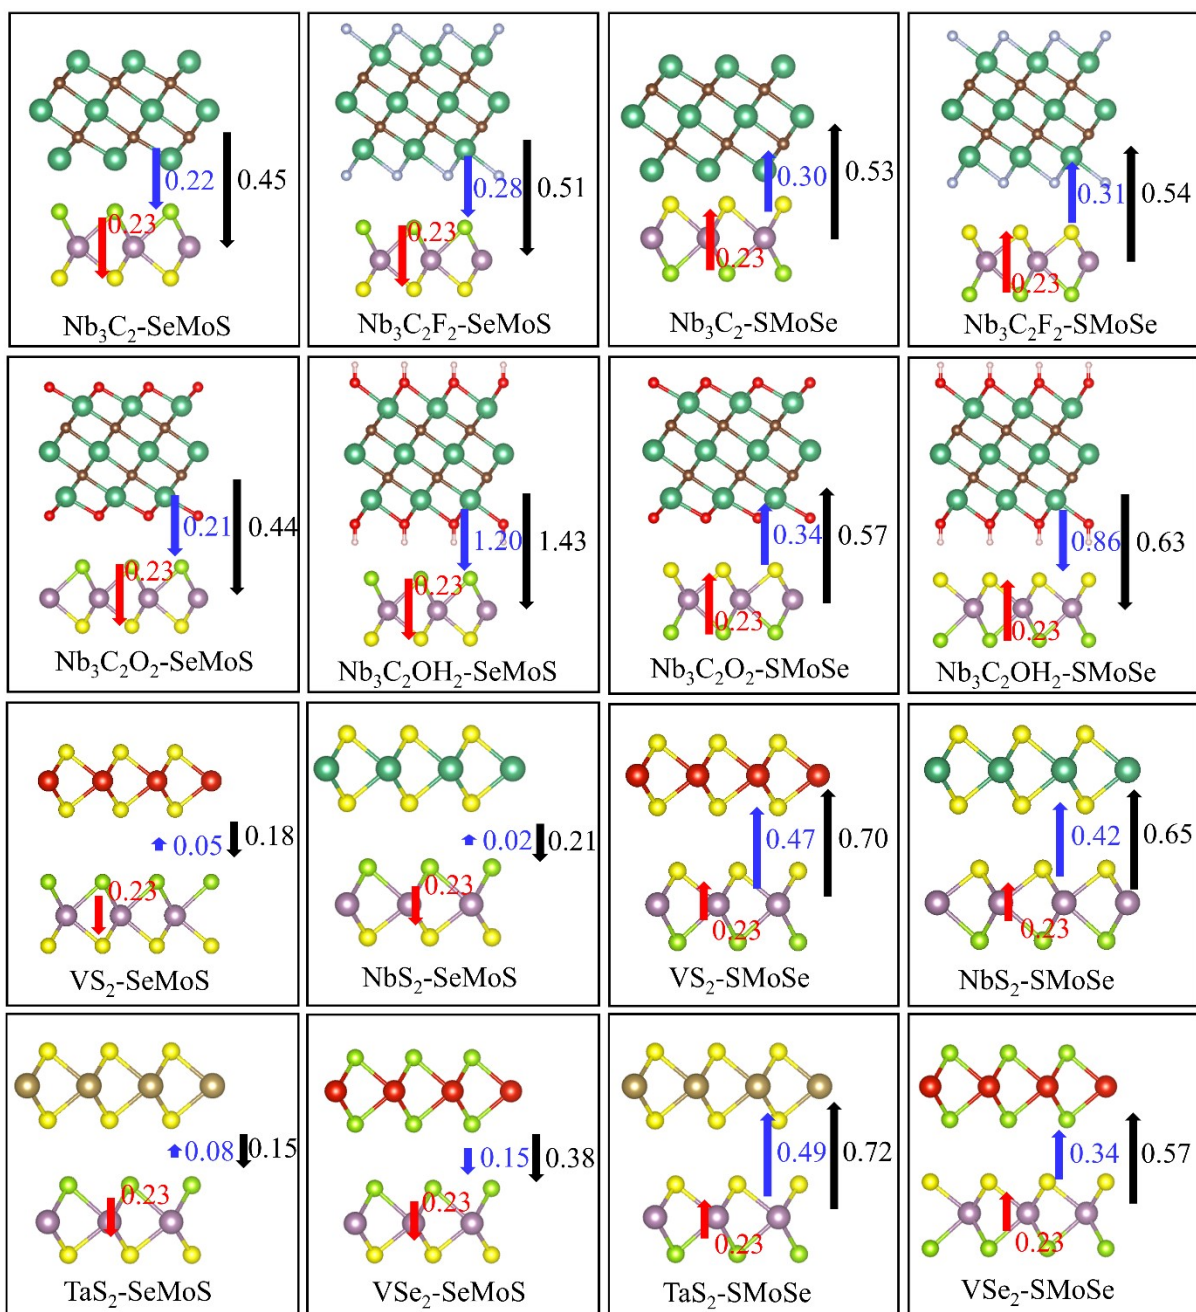

**Fig. S6** The dipole moment distributions of 2D metal-MoSSe contacts. The red, blue and black arrows represent the intrinsic dipole, interface dipole and tot dipole, respectively.

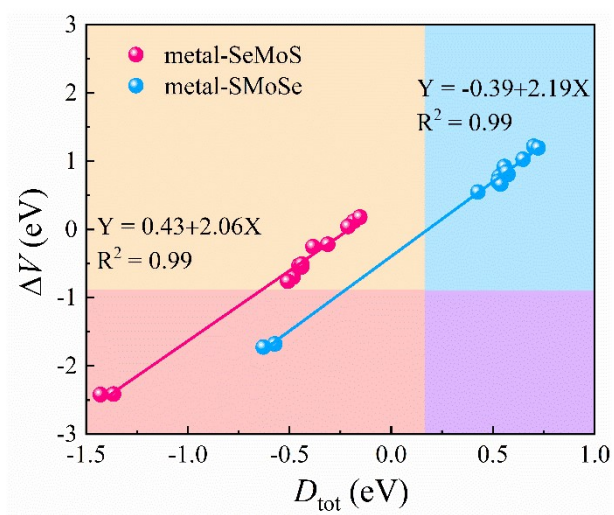

**Fig. S7** The change of  $\Delta V$  with tot dipole moment ( $D_{\text{tot}}$ ) for 2D metal-MoSSe contacts.

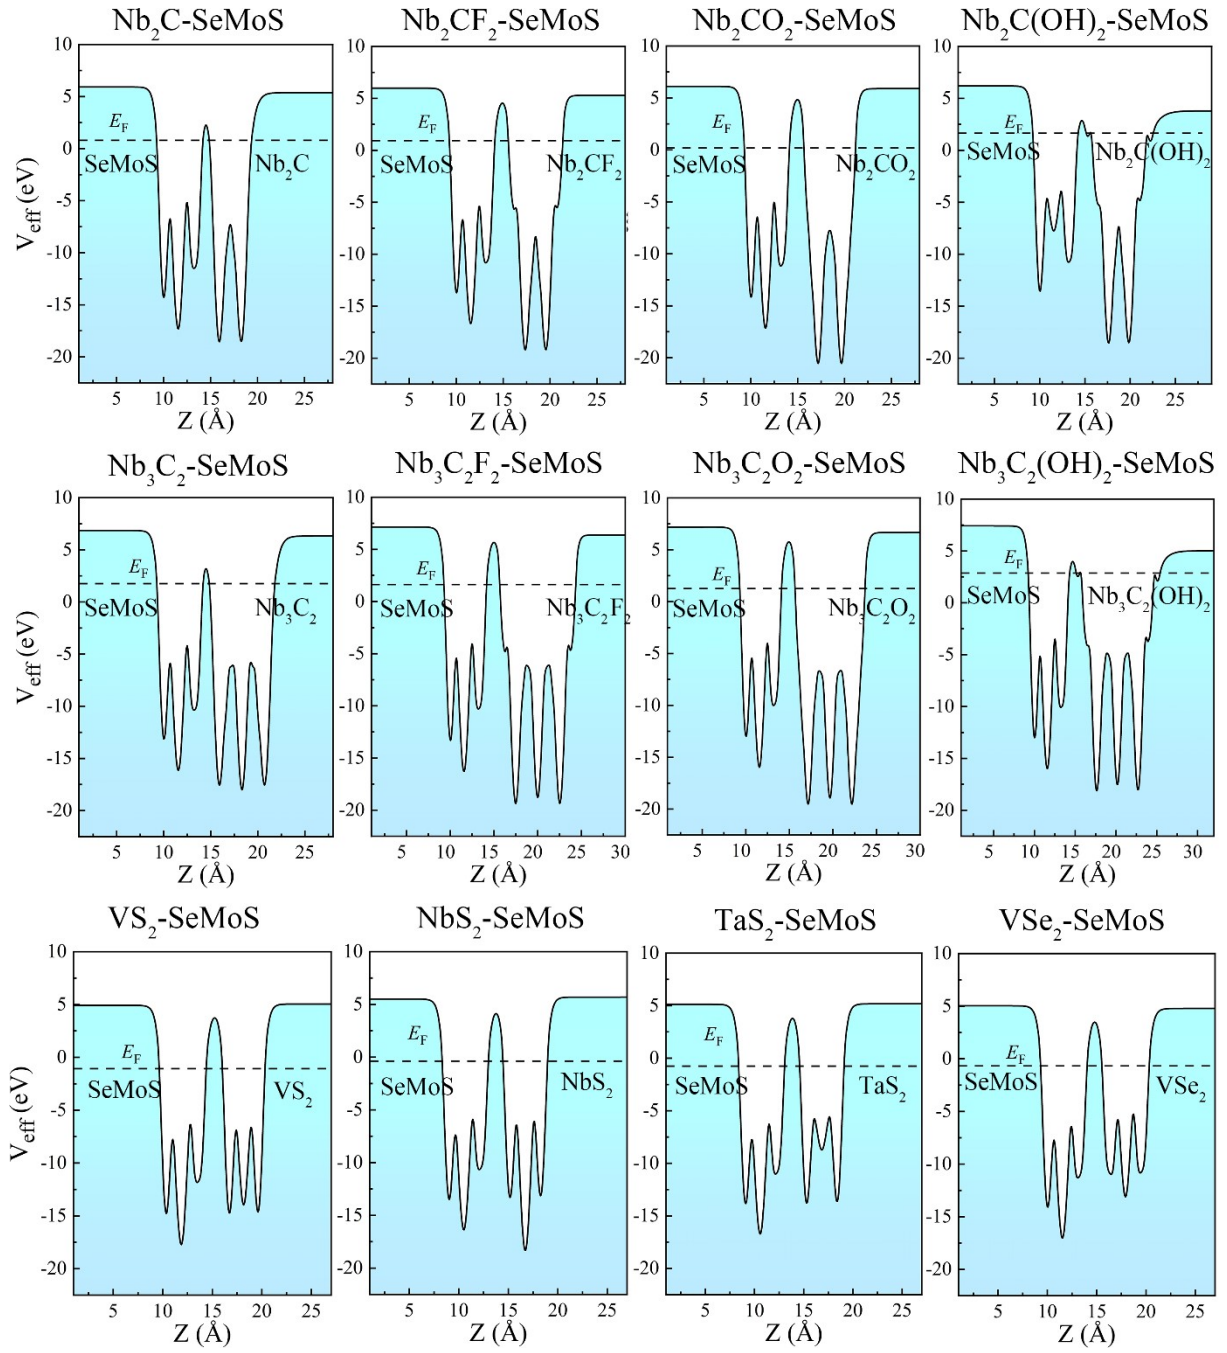

**Fig. S8** Effective electrostatic potential of 2D metal-SeMoS contacts.

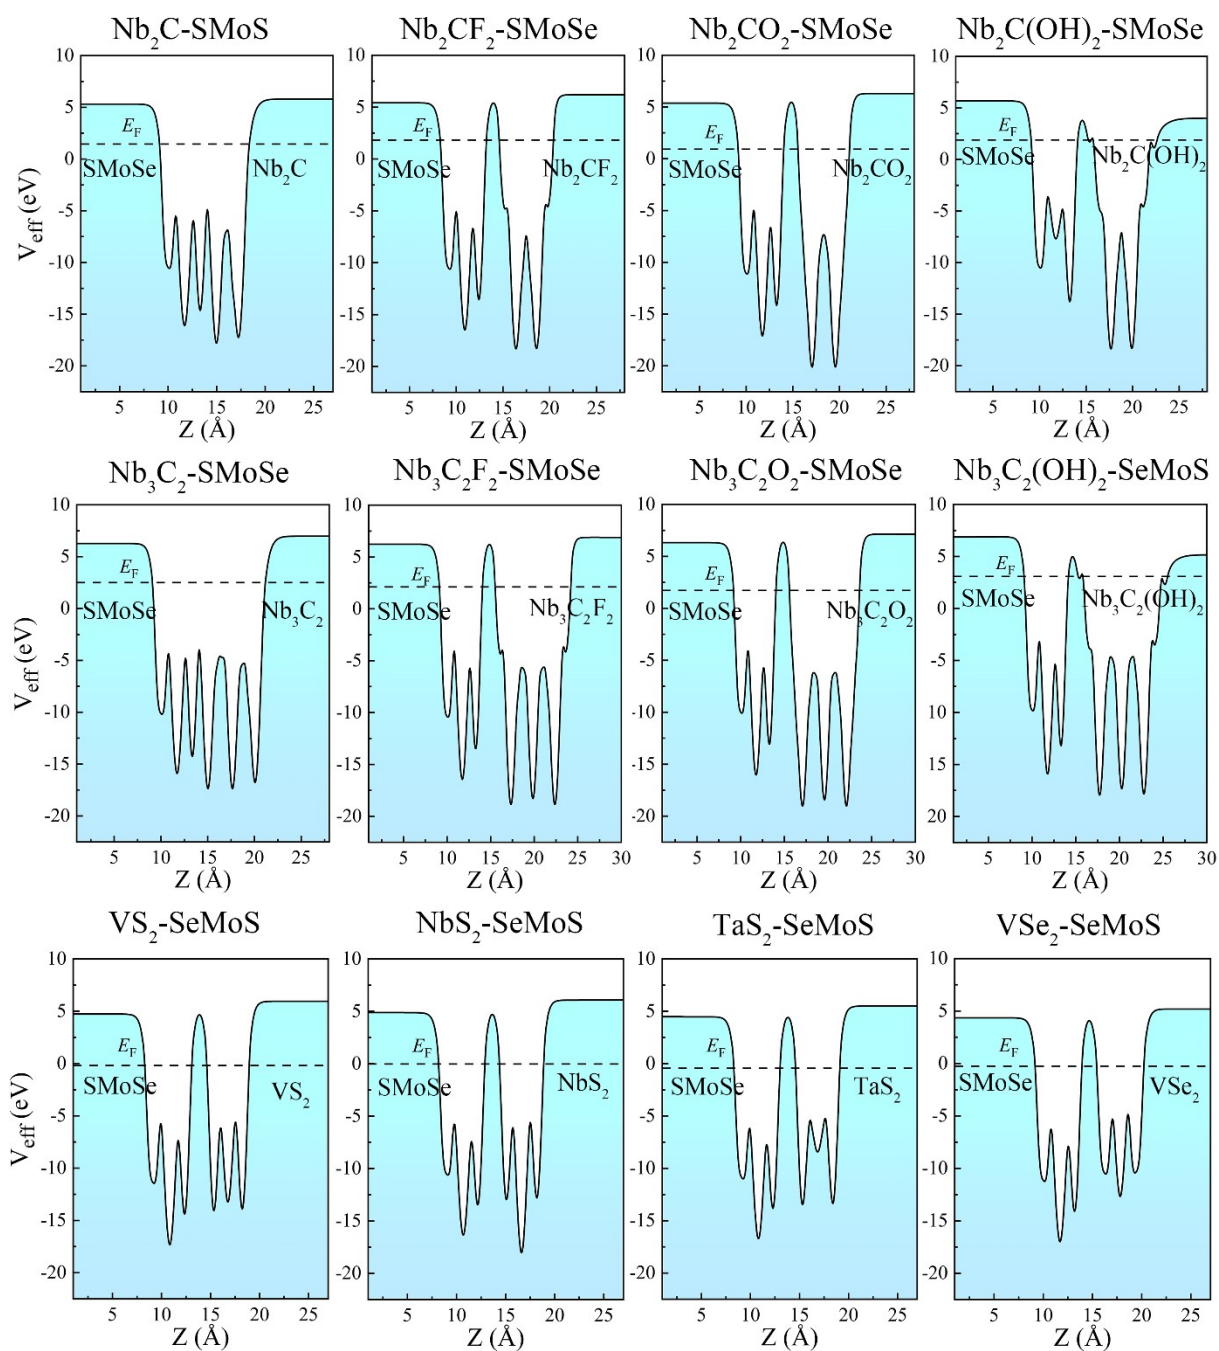

**Fig. S9** Effective electrostatic potential of 2D metal-SMoSe contacts.



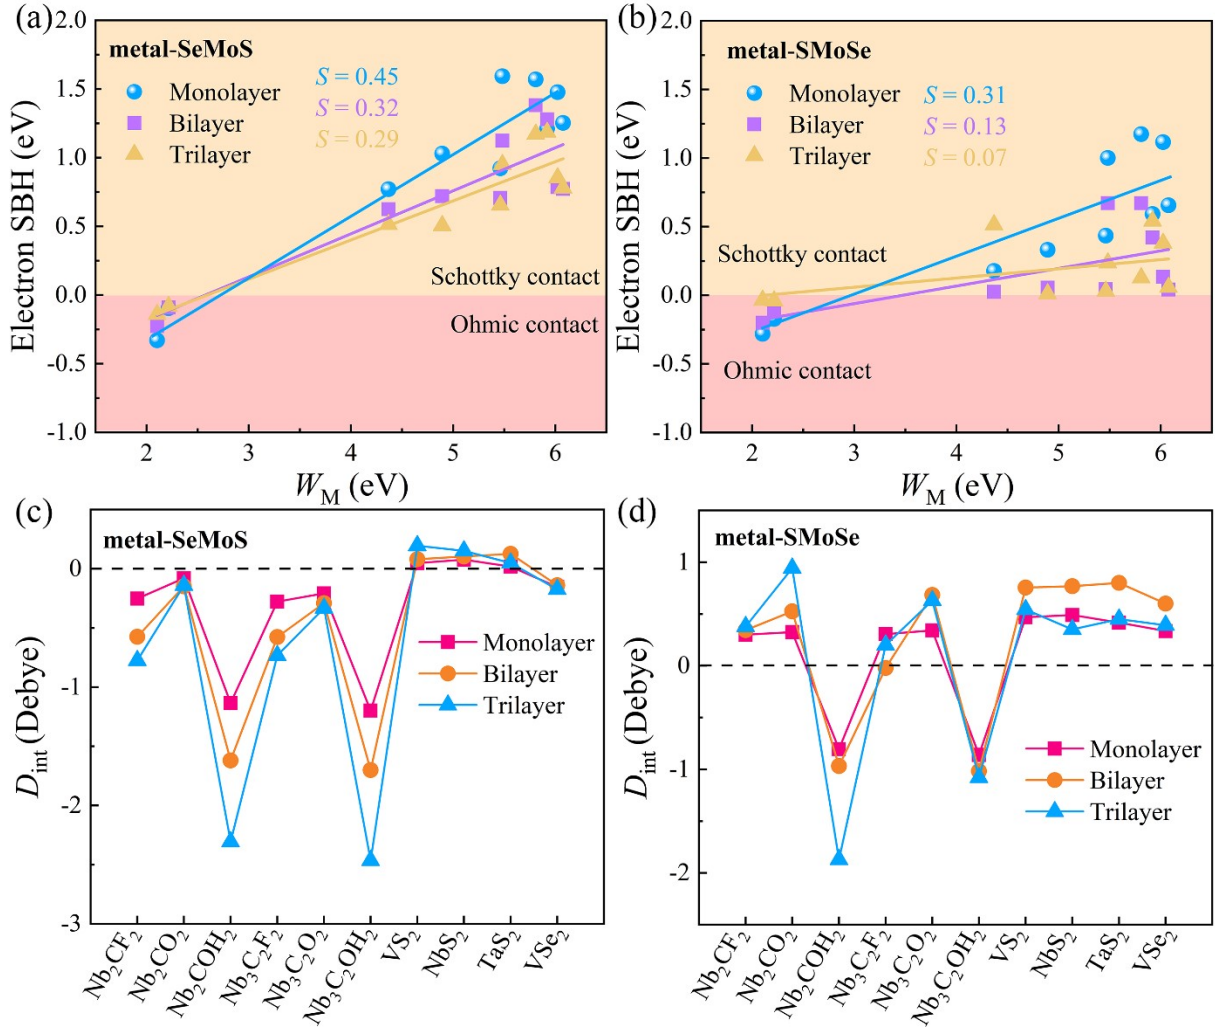

**Fig. S10** The variation of electron SBH as a function of metal work functions ( $W_M$ ) for (a) metal-SeMoS (b) metal-SMoSe contacts. The Fermi level pinning factor  $S$  is defined as the value of the fitted slope. Variation of the interface dipole ( $D_{int}$ ) in the (c) metal-SeMoS and (d) metal-SMoSe contacts.

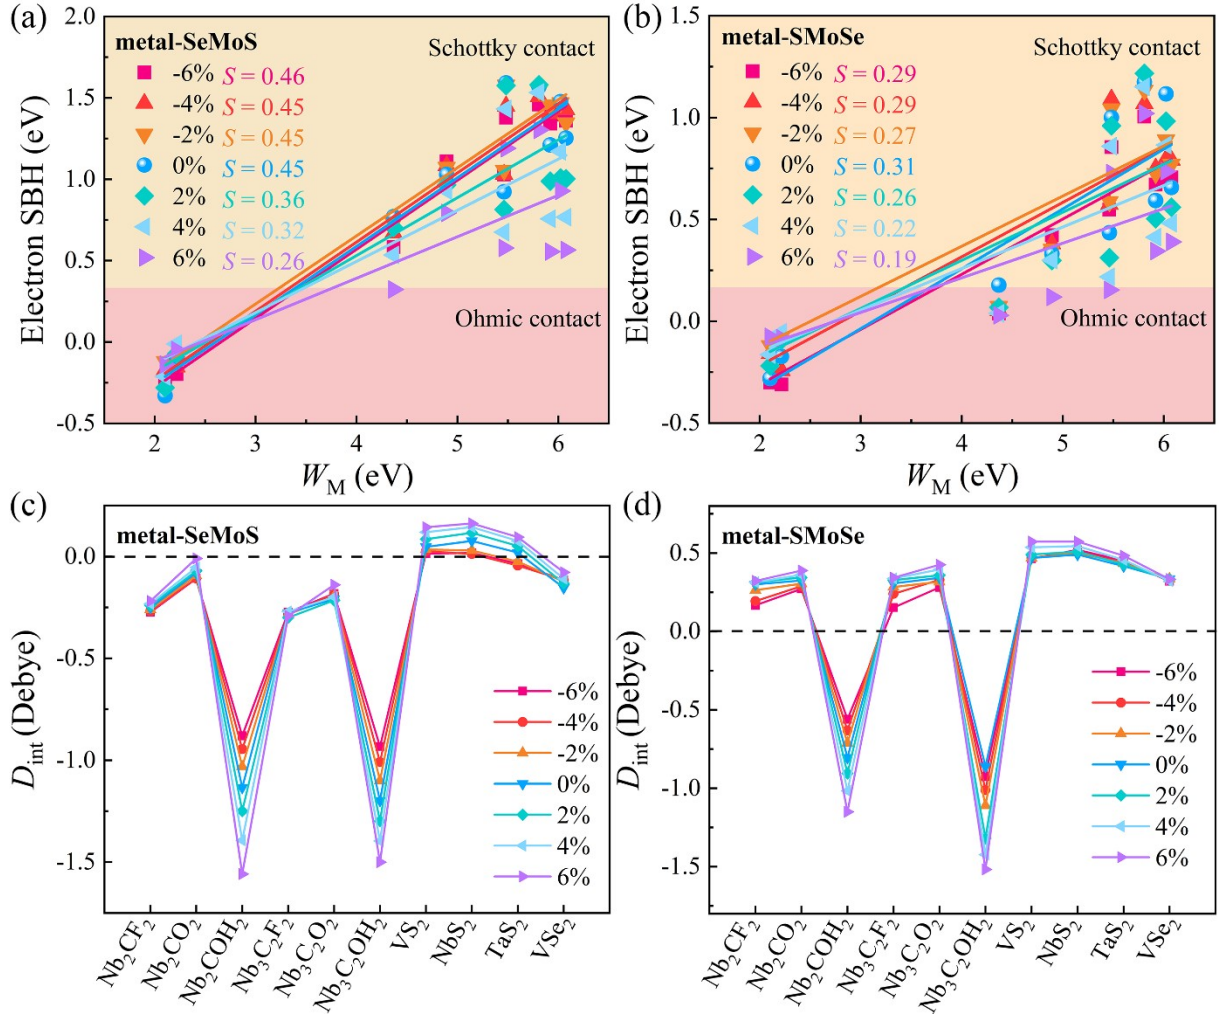

**Fig. S11** The variation of electron SBH as a function of metal work functions ( $W_M$ ) for (a) metal-SeMoS (b) metal-SMoSe contacts. The Fermi level pinning factor  $S$  is defined as the value of the fitted slope. Variation of the interface dipole ( $D_{int}$ ) in the (c) metal-SeMoS and (d) metal-SMoSe contacts.

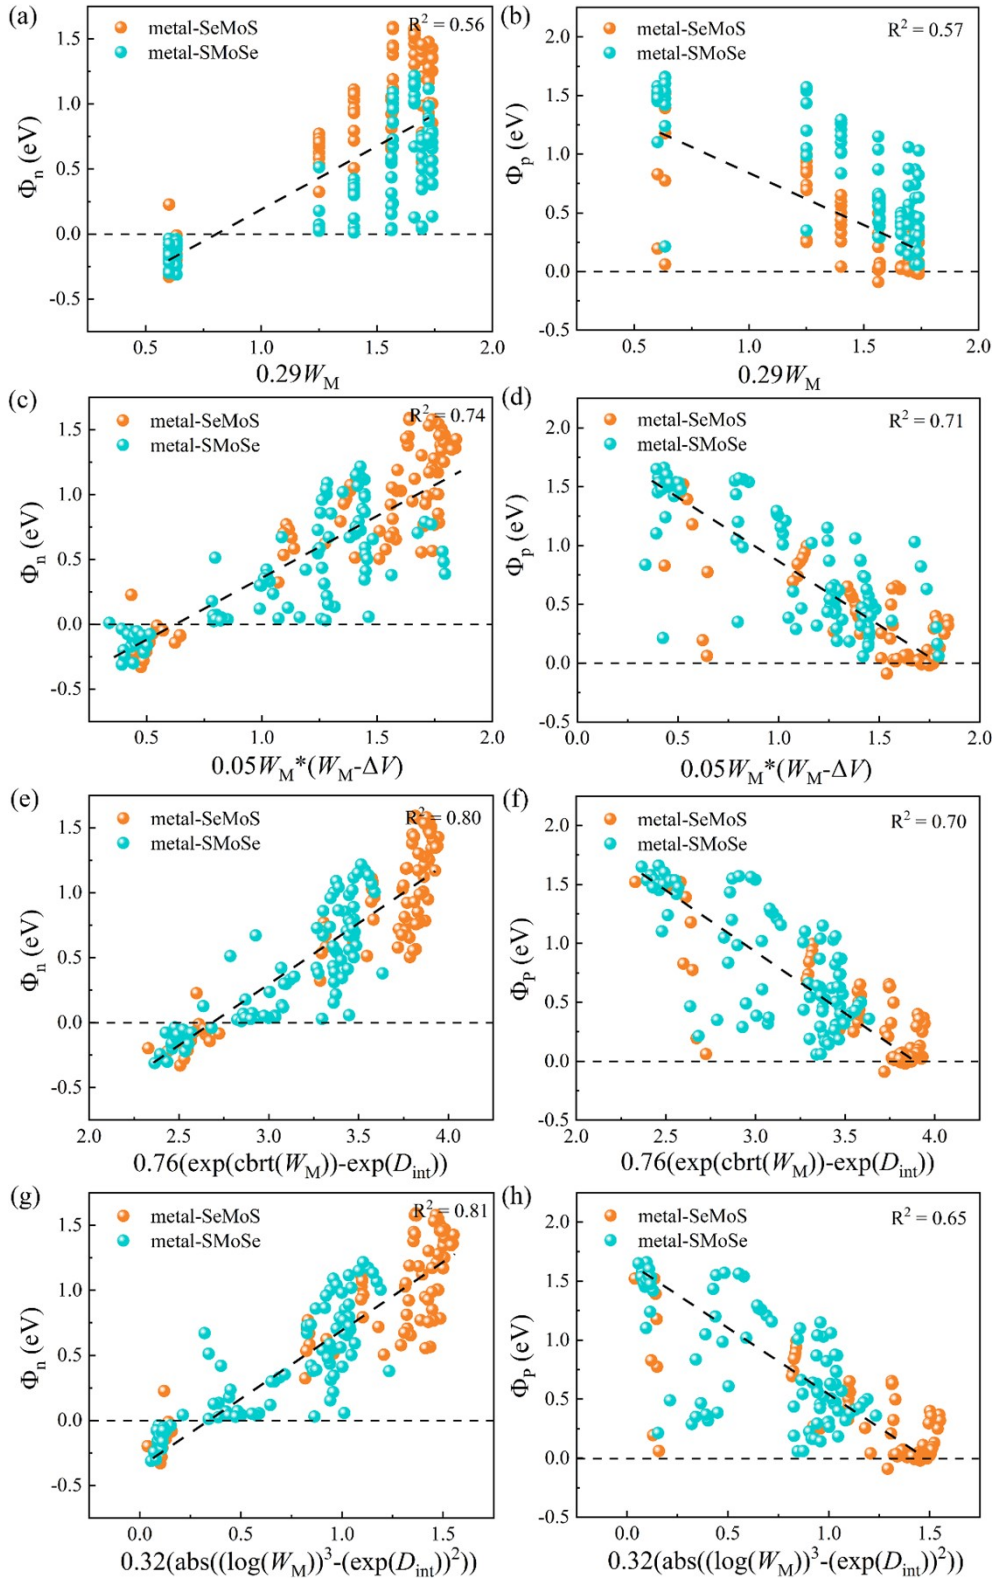

**Fig. S12** The correlations of the calculated (a)  $\Phi_n$  and (b)  $\Phi_p$  values of metal-MoSSe contacts vs. predicted  $0.29W_M$  formula from SISSO. The correlations of the calculated (c)  $\Phi_n$  and (d)  $\Phi_p$  values of metal-MoSSe contacts vs. predicted  $0.05W_M*(W_M-\Delta V)$  formula from SISSO. The correlations of the calculated (e)  $\Phi_n$  and (f)  $\Phi_p$  values of metal-MoSSe contacts vs. predicted  $0.76(\exp(\text{cbrt}(W_M))-\exp(D_{\text{int}}))$  formula from SISSO. The correlations of the calculated (g)  $\Phi_n$  and (h)  $\Phi_p$  values of metal-MoSSe contacts vs. predicted  $0.32(\text{abs}((\log(W_M))^3)-(\exp(D_{\text{int}}))^2)$  formula from SISSO.

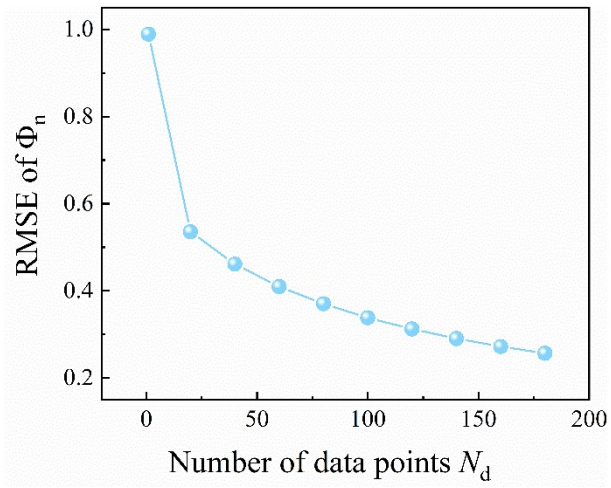

**Fig. S13** The root-mean-square error (RMSE) of  $\Phi_n$  is plotted as a function of the training data set size,  $N_d$  using the supervised data sampling method.
